# Supplementary material for: Symptomatic and Asymptomatic Protist Infections in Hospital Inpatients in Southwestern China
Source: MDPI journal article supplement (doi:10.3390/pathogens10060684), 2021-05-31
Supplement: s1 [file s1]

**Table S1** Oligonucleotides and PCR conditions used for the molecular identification and/or characterization of the intestinal protist parasites investigated in Tengchong City, southwest China.

| Enteric pathogen            | Locus            | Primers name | Primer (5'–3')             | Amplicon size (bp) | Cycling conditions                                                          | Reference |
|-----------------------------|------------------|--------------|----------------------------|--------------------|-----------------------------------------------------------------------------|-----------|
| <i>Giardia duodenalis</i>   | <i>tpi</i>       | AL3543       | AAATATGCCTGCTCGTCG         | 605                | Denaturation: 94 °C for 45 s                                                | [49]      |
|                             |                  | AL3546       | CAAACCTTITCCGCAAACC        |                    | Annealing: 50 °C for 45 s                                                   |           |
|                             |                  | AL3544       | CCCTTCATCGGIGGTAAGTT       | 530                | Elongation: 72 °C for 1 min                                                 |           |
|                             |                  | AL3545       | GTGGCCACCACICCCGTGCC       |                    | No. cycles: 35                                                              |           |
| <i>Cryptosporidium</i> spp. | <i>ssu</i> -rRNA | Primer F1    | TTCTAGAGCTAATACATGCG       | 1,325              | Denaturation: 94 °C for 1 min                                               | [48]      |
|                             |                  | Primer R1    | CCCATTTCCTTCGAAACAGGA      | 840                | Annealing: 55 (1 <sup>st</sup> ) or 58 (2 <sup>nd</sup> ) °C for 1 min      |           |
|                             |                  | Primer F2    | GGAAGGGTTGTATTTATTAGATAAAG |                    | Elongation: 72 °C for 1 min                                                 |           |
|                             |                  | Primer R2    | CTCATAAGGTGCTGAAGGAGTA     |                    | No. cycles: 35                                                              |           |
| <i>E. histolytica</i>       | <i>ssu</i> -rRNA | E1           | TGCTGTGATTAACGCT           | 1,947              | Denaturation: 94 °C for 1 min                                               | [50]      |
|                             |                  | E2           | TTAACTATTTCAATCTCGG        |                    | Annealing: 47 (1 <sup>st</sup> ) or 58 (2 <sup>nd</sup> ) °C for 1 min      |           |
|                             |                  | Eh-L         | ACATTTTGAAGACTTTATGTAAGTA  | 427                | Elongation: 72 °C for 1 min                                                 |           |
|                             |                  | Eh-R         | CAGATCTAGAAACAATGCTTCTCT   |                    | No. cycles: 35                                                              |           |
| <i>Blastocystis</i> sp.     | <i>ssu</i> -rRNA | Forward      | GGAGGTAGTGACAATAAATC       | 1,100              | Denaturation: 94 °C for 1 min                                               | [47]      |
|                             |                  | Reverse      | ACTAGGAATTCCTCGTTCATG      |                    | Annealing: 54 °C for 1 min<br>Elongation: 72 °C for 1 min<br>No. cycles: 35 |           |

*ssu* rRNA, small subunit ribosomal RNA; *tpi*, Triose phosphate isomerase
